# Supplementary material
Source: Elsevier journal article supplement (https://oceanrep.geomar.de/id/eprint/2156/3/mmc1.doc)

In order to reduce biases in the representation of seepage site distribution, a statistical analysis of the acoustic coverage was realized using SIG techniques. First of all,the sea of Marmara area is gridded within a mesh of 2x2 km squares (Supp_Fig. 1a). Within each of these squares, the lengths of the survey lines (both SAR and EK60) were summed using Hawth’s analysis tools (Beyer 2004). Resulting total length of the survey lines are represented here below in Supp_Fig.1b. Grey squares are areas were no acoustic survey took place, the different blue colors stands for total length of survey lines (both SAR and EK60) up to 20.47 km. The total number of acoustic anomalies (both SAR and EK60) within each square is also calculated using Hawth’s analysis tools. This number divided by the total length of survey lines represents the numbers of acoustics anomalies per kilometer length of survey (Supp_Fig. 1c). It is assumed representative of the density of gas emissions.

Beyer, H. L. 2004. Hawth's Analysis Tools for ArcGIS. Available on line : http://www.spatialecology.com/htools.


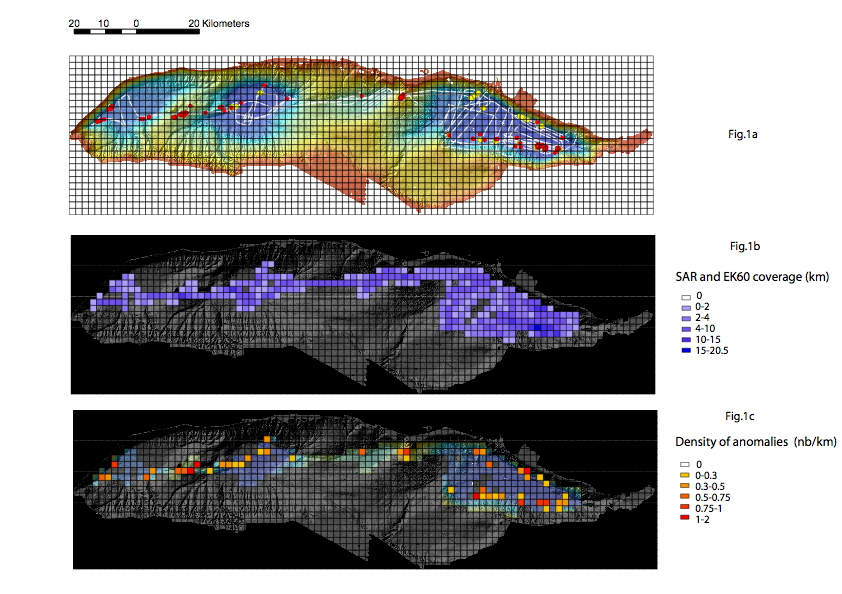

Supplement: mmc1 [file mmc1.doc]
